# Supplementary material for: 2016 SOSORT guidelines: orthopaedic and rehabilitation treatment of idiopathic scoliosis during growth
Source: Springer Nature journal article supplement (doi:10.1186/s13013-017-0145-8), 2018-01-10
Supplement: MOESM3 [file 15361988]

**Dear colleagues**

**this Consensus process is part of the development of the 2016 SOSORT Guidelines that will adjourn and substitute the 2011 Guidelines (<http://scoliosisjournal.biomedcentral.com/articles/10.1186/1748-7161-7-3>) and will be published in our official journal Scoliosis and Spinal Deformity.**

**After the previous Consensus on classifications and treatments, it is now the time to reach a Consensus on the recommendations. You will have to approve or reject the recommendations, and rate their importance. Moreover you can still give suggestions for other recommendations, and or to change and improve the actual version of the recommendations.**

**Please fill in accurately this questionnaire so to make our Guidelines stronger and really representative of our community of expert in conservative orthopedic and rehabilitation scoliosis treatment.**

**IMPORTANT NOTE. When there is some evidence on the recommendation, that has been specified using LoE (Level of Evidence) with a number as follow:**

- I : Multiple Randomized Controlled Trials or Systematic Reviews of such studies**
- II: One Randomized Controlled Trial**
- III: Multiple Controlled nonrandomized Studies or Systematic Reviews of such studies**
- IV: Other studies**

**Other two Levels will be defined according to this Consensus results**

- V: SOSORT Consensus with more than 90% of agreement**
- VI: SOSORT Consensus with 70 to 89% of agreement**

**When you do not find LoE number, that means that it will be defined after this Consensus.**

**When there is a literature LoE on a specific recommendation, by definition what can be done is only a rephrasing the recommendation but it cannot be simply rejected.**

**Thank you for participating in our Consensus. Your feedback is important.**

**Bracing is recommended to treat adolescent idiopathic scoliosis**

**LoE: I**

1. Do you think this recommendation should be rephrased?

- No
- Yes, with the following correction

2. What is the strength of this recommendation ?

- it must be applied widely and to all patients with this specific need
- it is important, but can be applied not to all patients with this specific need
- less important, it can be applied on a voluntary basis
- very low importance

## Bracing

**Bracing is recommended to treat juvenile and infantile idiopathic scoliosis as the first step in an attempt to avoid or at least postpone surgery to a more adequate age**

3. Do you agree with this recommendation ?

- No
- Yes
- Yes, with the following correction

4. What is the strength of this recommendation ?

- it must be applied widely and to all patients with this specific need
- it is important, but can be applied not to all patients with this specific need
- less important, it can be applied on a voluntary basis
- very low importance

## Bracing

**Casting (or very rigid bracing) is recommended to treat infantile idiopathic scoliosis to try stabilizing the curve**

5. Do you agree with this recommendation ?

- No
- Yes
- Yes, with the following correction

6. What is the strength of this recommendation ?

- it must be applied widely and to all patients with this specific need
- it is important, but can be applied not to all patients with this specific need
- less important, it can be applied on a voluntary basis
- very low importance

## Bracing

**It is recommended not to apply bracing to treat patients with curves below  $15\pm 5^\circ$  Cobb, unless otherwise justified in the opinion of a clinician specialized in conservative treatment of spinal deformities**

7. Do you agree with this recommendation ?

- No
- Yes
- Yes, with the following correction

8. What is the strength of this recommendation ?

- it must be applied widely and to all patients with this specific need
- it is important, but can be applied not to all patients with this specific need
- less important, it can be applied on a voluntary basis
- very low importance

## Bracing

**Bracing is recommended to treat patients with curves above  $20\pm 5^\circ$  Cobb, still growing, and demonstrated progression of deformity or elevated risk of worsening, unless otherwise justified in the opinion of a clinician specialized in conservative treatment of spinal deformities**

**LoE I**

9. Do you think this recommendation should be rephrased?

- No
- Yes, with the following correction

10. What is the strength of this recommendation ?

- it must be applied widely and to all patients with this specific need
- it is important, but can be applied not to all patients with this specific need
- less important, it can be applied on a voluntary basis
- very low importance

## Bracing

**It is recommended that each treating team provide the brace that they know best and are most prepared to manage: due to the actual knowledge, there is no brace that can be recommended over the others**

11. Do you agree with this recommendation ?

- No
- Yes
- Yes, with the following correction

12. What is the strength of this recommendation ?

- it must be applied widely and to all patients with this specific need
- it is important, but can be applied not to all patients with this specific need
- less important, it can be applied on a voluntary basis
- very low importance

## Bracing

**It is recommended that braces are worn full time or no less than 18 hours per day at the beginning of treatment, unless otherwise justified in the opinion of a clinician specialized in conservative treatment of spinal deformities**

**LoE: II**

13. Do you think this recommendation should be rephrased?

- No
- Yes, with the following correction

14. What is the strength of this recommendation ?

- it must be applied widely and to all patients with this specific need
- it is important, but can be applied not to all patients with this specific need
- less important, it can be applied on a voluntary basis
- very low importance



**Since there is a “dose-response” to treatment, it is recommended that the hours of bracing per day are in proportion with the severity of deformity, the age of the patient, the stage, aim and overall results of treatment, and the achievable compliance**

**LoE: II**

15. Do you think this recommendation should be rephrased?

- No
- Yes, with the following correction

16. What is the strength of this recommendation ?

- it must be applied widely and to all patients with this specific need
- it is important, but can be applied not to all patients with this specific need
- less important, it can be applied on a voluntary basis
- very low importance

## Bracing

**It is recommended that braces are worn until the end of vertebral bone growth and then the wearing time is gradually reduced, unless otherwise justified in the opinion of a clinician specialized in conservative treatment of spinal deformities**

17. Do you agree with this recommendation ?

- No
- Yes
- Yes, with the following correction

18. What is the strength of this recommendation ?

- it must be applied widely and to all patients with this specific need
- it is important, but can be applied not to all patients with this specific need
- less important, it can be applied on a voluntary basis
- very low importance

## Bracing

**It is recommended that the wearing time of the brace is gradually reduced, while performing stabilizing exercises, to allow adaptation of the postural system and maintain results**

19. Do you agree with this recommendation ?

- No
- Yes
- Yes, with the following correction

20. What is the strength of this recommendation ?

- it must be applied widely and to all patients with this specific need
- it is important, but can be applied not to all patients with this specific need
- less important, it can be applied on a voluntary basis
- very low importance

## Bracing

**It is recommended that any mean is used to increase and monitor compliance, including heat sensors, and a careful adherence to the recommendations defined in the SOSORT Guidelines for Bracing Management**

21. Do you agree with this recommendation ?

- No
- Yes
- Yes, with the following correction

22. What is the strength of this recommendation ?

- it must be applied widely and to all patients with this specific need
- it is important, but can be applied not to all patients with this specific need
- less important, it can be applied on a voluntary basis
- very low importance

## Bracing

**It is recommended that quality of the brace is checked through an in-brace x-ray**

23. Do you agree with this recommendation ?

- No
- Yes
- Yes, with the following correction

24. What is the strength of this recommendation ?

- it must be applied widely and to all patients with this specific need
- it is important, but can be applied not to all patients with this specific need
- less important, it can be applied on a voluntary basis
- very low importance

## Bracing

**It is recommended that the prescribing physician and the constructing orthotist are experts according to the criteria defined in the SOSORT Guidelines for Bracing Management**

25. Do you agree with this recommendation ?

- No
- Yes
- Yes, with the following correction

26. What is the strength of this recommendation ?

- it must be applied widely and to all patients with this specific need
- it is important, but can be applied not to all patients with this specific need
- less important, it can be applied on a voluntary basis
- very low importance

## Bracing

**It is recommended that bracing is applied by a well trained therapeutic team, including a physician, an orthotist and a therapist, according to the criteria defined in the SOSORT Guidelines for Bracing Management**

27. Do you agree with this recommendation ?

- No
- Yes
- Yes, with the following correction

28. What is the strength of this recommendation ?

- it must be applied widely and to all patients with this specific need
- it is important, but can be applied not to all patients with this specific need
- less important, it can be applied on a voluntary basis
- very low importance

## Bracing

**It is recommended that all the phases of brace construction (prescription, construction, check, correction, follow-up) are carefully followed for each single brace according to the criteria defined in the SOSORT Guidelines for Bracing Management**

29. Do you agree with this recommendation ?

- No
- Yes
- Yes, with the following correction

30. What is the strength of this recommendation ?

- it must be applied widely and to all patients with this specific need
- it is important, but can be applied not to all patients with this specific need
- less important, it can be applied on a voluntary basis
- very low importance



## Bracing

**It is recommended that the brace is specifically designed for the type of the curve to be treated**

31. Do you agree with this recommendation ?

- No
- Yes
- Yes, with the following correction

32. What is the strength of this recommendation ?

- it must be applied widely and to all patients with this specific need
- it is important, but can be applied not to all patients with this specific need
- less important, it can be applied on a voluntary basis
- very low importance

## Bracing

**It is recommended that the brace proposed for treating a scoliotic deformity takes into account all the three planes: frontal, horizontal and sagittal**

33. Do you agree with this recommendation ?

- No
- Yes
- Yes, with the following correction

34. What is the strength of this recommendation ?

- it must be applied widely and to all patients with this specific need
- it is important, but can be applied not to all patients with this specific need
- less important, it can be applied on a voluntary basis
- very low importance

## Bracing

**It is recommended to use the least invasive brace in relation to the clinical situation, provided the same effectiveness, to reduce the psychological impact and to ensure better patient compliance**

35. Do you agree with this recommendation ?

- No
- Yes
- Yes, with the following correction

36. What is the strength of this recommendation ?

- it must be applied widely and to all patients with this specific need
- it is important, but can be applied not to all patients with this specific need
- less important, it can be applied on a voluntary basis
- very low importance

## Bracing

**It is recommended that braces do not restrict thorax excursion in a way that reduces respiratory function**

37. Do you agree with this recommendation ?

- No
- Yes
- Yes, with the following correction

38. What is the strength of this recommendation ?

- it must be applied widely and to all patients with this specific need
- it is important, but can be applied not to all patients with this specific need
- less important, it can be applied on a voluntary basis
- very low importance

## Bracing

**It is recommended that braces are prescribed, constructed and fitted in an out-patient setting**

39. Do you agree with this recommendation ?

- No
- Yes
- Yes, with the following correction

40. What is the strength of this recommendation ?

- it must be applied widely and to all patients with this specific need
- it is important, but can be applied not to all patients with this specific need
- less important, it can be applied on a voluntary basis
- very low importance

## Bracing

41. Do you suggest any other relevant recommendation on bracing ?

42. Do you suggest any other relevant recommendation on bracing ?

**Physiotherapeutic Scoliosis Specific Exercises are recommended as the first step to treat idiopathic scoliosis to prevent/limit progression of the deformity and bracing**

**LoE: I**

43. Do you think this recommendation should be rephrased?

- No
- Yes, with the following correction

44. What is the strength of this recommendation ?

- it must be applied widely and to all patients with this specific need
- it is important, but can be applied not to all patients with this specific need
- less important, it can be applied on a voluntary basis
- very low importance

**It is recommended that Physiotherapeutic Scoliosis Specific Exercises follow SOSORT Consensus and are based on auto-correction in 3D, training in ADL, stabilizing the corrected posture, and patient education**

**LoE: II**

45. Do you think this recommendation should be rephrased?

- No
- Yes, with the following correction

46. What is the strength of this recommendation ?

- it must be applied widely and to all patients with this specific need
- it is important, but can be applied not to all patients with this specific need
- less important, it can be applied on a voluntary basis
- very low importance



**It is recommended that Physiotherapeutic Scoliosis Specific Exercises follow one of the Schools that have shown the effectiveness of their approach with scientific studies**

**LoE: III**

47. Do you think this recommendation should be rephrased?

- No
- Yes, with the following correction

48. What is the strength of this recommendation ?

- it must be applied widely and to all patients with this specific need
- it is important, but can be applied not to all patients with this specific need
- less important, it can be applied on a voluntary basis
- very low importance

## Physiotherapeutic Scoliosis Specific Exercises

**It is recommended that Physiotherapeutic Scoliosis Specific Exercise programs are designed by therapists specifically trained in the School they use**

49. Do you agree with this recommendation ?

- No
- Yes
- Yes, with the following correction

50. What is the strength of this recommendation ?

- it must be applied widely and to all patients with this specific need
- it is important, but can be applied not to all patients with this specific need
- less important, it can be applied on a voluntary basis
- very low importance

## Physiotherapeutic Scoliosis Specific Exercises

**It is recommended that Physiotherapeutic Scoliosis Specific Exercises are proposed by therapists included in scoliosis treatment teams, with close cooperation between all members**

51. Do you agree with this recommendation ?

- No
- Yes
- Yes, with the following correction

52. What is the strength of this recommendation ?

- it must be applied widely and to all patients with this specific need
- it is important, but can be applied not to all patients with this specific need
- less important, it can be applied on a voluntary basis
- very low importance

**It is recommended that Physiotherapeutic Scoliosis Specific Exercises are individualized according to patients needs, curve pattern, and treatment phase**

53. Do you think this recommendation should be rephrased?

- No
- Yes, with the following correction

54. What is the strength of this recommendation ?

- it must be applied widely and to all patients with this specific need
- it is important, but can be applied not to all patients with this specific need
- less important, it can be applied on a voluntary basis
- very low importance

**It is recommended that Physiotherapeutic Scoliosis Specific Exercises are always individualized even if performed in small groups**

55. Do you agree with this recommendation ?

- No
- Yes
- Yes, with the following correction

56. What is the strength of this recommendation ?

- it must be applied widely and to all patients with this specific need
- it is important, but can be applied not to all patients with this specific need
- less important, it can be applied on a voluntary basis
- very low importance

## Physiotherapeutic Scoliosis Specific Exercises

**It is recommended that Physiotherapeutic Scoliosis Specific Exercises are performed regularly throughout treatment to achieve best results**

57. Do you agree with this recommendation ?

- No
- Yes
- Yes, with the following correction

58. What is the strength of this recommendation ?

- it must be applied widely and to all patients with this specific need
- it is important, but can be applied not to all patients with this specific need
- less important, it can be applied on a voluntary basis
- very low importance

## Physiotherapeutic Scoliosis Specific Exercises

59. Do you suggest any other relevant recommendation on Physiotherapeutic Scoliosis Specific Exercises ?

60. Do you suggest any other relevant recommendation on Physiotherapeutic Scoliosis Specific Exercises ?

**It is recommended that Physiotherapeutic Scoliosis Specific Exercises are performed during brace treatment**

**LoE: II**

61. Do you think this recommendation should be rephrased?

- No
- Yes, with the following correction

62. What is the strength of this recommendation ?

- it must be applied widely and to all patients with this specific need
- it is important, but can be applied not to all patients with this specific need
- less important, it can be applied on a voluntary basis
- very low importance



**It is recommended that, while treating with Physiotherapeutic Scoliosis Specific Exercises, therapists work to increase compliance of the patient to brace treatment**

**LoE: II**

63. Do you think this recommendation should be rephrased?

- No
- Yes, with the following correction

64. What is the strength of this recommendation ?

- it must be applied widely and to all patients with this specific need
- it is important, but can be applied not to all patients with this specific need
- less important, it can be applied on a voluntary basis
- very low importance

**It is recommended that spinal mobilization Physiotherapeutic Scoliosis Specific Exercises are used in preparation to bracing**

65. Do you agree with this recommendation ?

- No
- Yes
- Yes, with the following correction

66. What is the strength of this recommendation ?

- it must be applied widely and to all patients with this specific need
- it is important, but can be applied not to all patients with this specific need
- less important, it can be applied on a voluntary basis
- very low importance

**It is recommended that stabilization Physiotherapeutic Scoliosis Specific Exercises in autocorrection are used during brace weaning period**

67. Do you agree with this recommendation ?

- No
- Yes
- Yes, with the following correction

68. What is the strength of this recommendation ?

- it must be applied widely and to all patients with this specific need
- it is important, but can be applied not to all patients with this specific need
- less important, it can be applied on a voluntary basis
- very low importance

**It is recommended that Physiotherapeutic Scoliosis Specific Exercises in painful operated patients are used to reduce pain and increase function**

69. Do you agree with this recommendation ?

- No
- Yes
- Yes, with the following correction

70. What is the strength of this recommendation ?

- it must be applied widely and to all patients with this specific need
- it is important, but can be applied not to all patients with this specific need
- less important, it can be applied on a voluntary basis
- very low importance

**It is recommended that aerobic physiotherapy training be used prior to surgery.**

**LoE: II**

71. Do you think this recommendation should be rephrased?

- No
- Yes, with the following correction

72. What is the strength of this recommendation ?

- it must be applied widely and to all patients with this specific need
- it is important, but can be applied not to all patients with this specific need
- less important, it can be applied on a voluntary basis
- very low importance

73. Do you suggest any other relevant recommendation on Physiotherapeutic Scoliosis Specific Exercises during brace treatment and surgical therapy ?

74. Do you suggest any other relevant recommendation on Physiotherapeutic Scoliosis Specific Exercises during brace treatment and surgical therapy ?

## Other conservative treatments

**It is recommended that manual therapy (gentle, short-term mobilization, or releasing soft tissues techniques) is proposed only if associated with stabilization Physiotherapeutic Specific Exercises**

75. Do you agree with this recommendation ?

- No
- Yes
- Yes, with the following correction

76. What is the strength of this recommendation ?

- it must be applied widely and to all patients with this specific need
- it is important, but can be applied not to all patients with this specific need
- less important, it can be applied on a voluntary basis
- very low importance

## Other conservative treatments

**It is recommended that correction of real leg length discrepancy, if needed, is decided by a clinician specialized in conservative treatment of spinal deformities**

77. Do you agree with this recommendation ?

- No
- Yes
- Yes, with the following correction

78. What is the strength of this recommendation ?

- it must be applied widely and to all patients with this specific need
- it is important, but can be applied not to all patients with this specific need
- less important, it can be applied on a voluntary basis
- very low importance



## Other conservative treatments

**It is recommended that correction of real leg length discrepancy, if needed, is decided by a clinician specialized in conservative treatment of spinal deformities**

79. Do you agree with this recommendation ?

- No
- Yes
- Yes, with the following correction

80. What is the strength of this recommendation ?

- it must be applied widely and to all patients with this specific need
- it is important, but can be applied not to all patients with this specific need
- less important, it can be applied on a voluntary basis
- very low importance

## Other conservative treatments

**It is recommended that traditional Chinese medicine consisting of spinal balance exercises (Daoyin), manual spinal manipulation (Tuina), and acupotomology be used until the end of growth**

**LoE: II**

81. Do you think this recommendation should be rephrased?

- No
- Yes, with the following correction

82. What is the strength of this recommendation ?

- it must be applied widely and to all patients with this specific need
- it is important, but can be applied not to all patients with this specific need
- less important, it can be applied on a voluntary basis
- very low importance

## Other conservative treatments

83. Do you suggest any other relevant recommendation on Other conservative treatments ?

84. Do you suggest any other relevant recommendation on Other conservative treatments ?

**It is recommended that, when needed, exercises to improve respiratory function are used**

85. Do you agree with this recommendation ?

- No
- Yes
- Yes, with the following correction

86. What is the strength of this recommendation ?

- it must be applied widely and to all patients with this specific need
- it is important, but can be applied not to all patients with this specific need
- less important, it can be applied on a voluntary basis
- very low importance

**It is recommended during brace treatment to use exercises to improve respiratory function**

87. Do you agree with this recommendation ?

- No
- Yes
- Yes, with the following correction

88. What is the strength of this recommendation ?

- it must be applied widely and to all patients with this specific need
- it is important, but can be applied not to all patients with this specific need
- less important, it can be applied on a voluntary basis
- very low importance

**It is recommended the use of Physiotherapeutic Scoliosis Specific Exercises to train regional respiratory strategies to promote the expansion and ventilation of specific lung compartments**

89. Do you agree with this recommendation ?

- No
- Yes
- Yes, with the following correction

90. What is the strength of this recommendation ?

- it must be applied widely and to all patients with this specific need
- it is important, but can be applied not to all patients with this specific need
- less important, it can be applied on a voluntary basis
- very low importance

91. Do you suggest any other relevant recommendation on Respiratory function and exercises ?

92. Do you suggest any other relevant recommendation on Respiratory function and exercises ?

**It is recommended that sports is not prescribed as a treatment for idiopathic scoliosis**

**LoE: III**

93. Do you think this recommendation should be rephrased?

- No
- Yes, with the following correction

94. What is the strength of this recommendation ?

- it must be applied widely and to all patients with this specific need
- it is important, but can be applied not to all patients with this specific need
- less important, it can be applied on a voluntary basis
- very low importance



## Sport activities

**It is recommended that general sports activities are performed because of the specific benefits they offer to patients in terms of psychological, neuromotor and general organic well-being**

95. Do you agree with this recommendation ?

- No
- Yes
- Yes, with the following correction

96. What is the strength of this recommendation ?

- it must be applied widely and to all patients with this specific need
- it is important, but can be applied not to all patients with this specific need
- less important, it can be applied on a voluntary basis
- very low importance

## Sport activities

**It is recommended that, during all treatment phases, physical education at school is continued. Based on the severity of the curve and progression of the deformity and the opinion of a clinician specialized in conservative treatment of spinal deformities, restrictions may be placed on practicing certain types of sports activities**

97. Do you agree with this recommendation ?

- No
- Yes
- Yes, with the following correction

98. What is the strength of this recommendation ?

- it must be applied widely and to all patients with this specific need
- it is important, but can be applied not to all patients with this specific need
- less important, it can be applied on a voluntary basis
- very low importance

## Sport activities

**It is recommended that sports activities are continued also during brace treatment because of the physical (aerobic capacity) and psychological benefits these activities provide**

99. Do you agree with this recommendation ?

- No
- Yes
- Yes, with the following correction

100. What is the strength of this recommendation ?

- it must be applied widely and to all patients with this specific need
- it is important, but can be applied not to all patients with this specific need
- less important, it can be applied on a voluntary basis
- very low importance

## Sport activities

**It is recommended that, during brace treatment, contact or highly dynamic sport activities are performed with caution**

101. Do you agree with this recommendation ?

- No
- Yes
- Yes, with the following correction

102. What is the strength of this recommendation ?

- it must be applied widely and to all patients with this specific need
- it is important, but can be applied not to all patients with this specific need
- less important, it can be applied on a voluntary basis
- very low importance

**It is recommended that competitive activities that greatly mobilize the spine are avoided in patients with scoliosis at high risk of progression**

**LoE: III**

103. Do you think this recommendation should be rephrased?

- No
- Yes, with the following correction

104. What is the strength of this recommendation ?

- it must be applied widely and to all patients with this specific need
- it is important, but can be applied not to all patients with this specific need
- less important, it can be applied on a voluntary basis
- very low importance

## Sport activities

105. Do you suggest any other relevant recommendation on sport activities?

106. Do you suggest any other relevant recommendation on sport activities ?

**School screening programs are recommended for the early diagnosis of idiopathic scoliosis**

107. Do you agree with this recommendation ?

- No
- Yes
- Yes, with the following correction

108. What is the strength of this recommendation ?

- it must be applied widely and to all patients with this specific need
- it is important, but can be applied not to all patients with this specific need
- less important, it can be applied on a voluntary basis
- very low importance

**The schools screening should be perform with using the Scoliometer during trunk forward bend (Adam`s test)**

109. Do you agree with this recommendation ?

- No
- Yes
- Yes, with the following correction

110. What is the strength of this recommendation ?

- it must be applied widely and to all patients with this specific need
- it is important, but can be applied not to all patients with this specific need
- less important, it can be applied on a voluntary basis
- very low importance



**It is recommended that for scoliosis screening programs 5° and 7° of angle of trunk rotation should be used as criteria for referral**

111. Do you agree with this recommendation ?

- No
- Yes
- Yes, with the following correction

112. What is the strength of this recommendation ?

- it must be applied widely and to all patients with this specific need
- it is important, but can be applied not to all patients with this specific need
- less important, it can be applied on a voluntary basis
- very low importance

**After the evaluation of the reliability, the evaluation of the angle of trunk rotation may be also performed with using smarhpone aided appropriate application**

113. Do you agree with this recommendation ?

- No
- Yes
- Yes, with the following correction

114. What is the strength of this recommendation ?

- it must be applied widely and to all patients with this specific need
- it is important, but can be applied not to all patients with this specific need
- less important, it can be applied on a voluntary basis
- very low importance

**It is recommended that the scoliosis school screening should be completed by the joint hypermobility/laxity assessment**

115. Do you agree with this recommendation ?

- No
- Yes
- Yes, with the following correction

116. What is the strength of this recommendation ?

- it must be applied widely and to all patients with this specific need
- it is important, but can be applied not to all patients with this specific need
- less important, it can be applied on a voluntary basis
- very low importance

## Assessment

**It is recommended that the angle of trunk rotation with using of scoliometer or smartphone aided application is spread in the school community and among all people that are engaged in the health of children (parents included)**

117. Do you agree with this recommendation ?

- No
- Yes
- Yes, with the following correction

118. What is the strength of this recommendation ?

- it must be applied widely and to all patients with this specific need
- it is important, but can be applied not to all patients with this specific need
- less important, it can be applied on a voluntary basis
- very low importance

**It is recommended that the evaluation of the angle of trunk rotation is used to assess the effectiveness of conservative treatment**

119. Do you agree with this recommendation ?

- No
- Yes
- Yes, with the following correction

120. What is the strength of this recommendation ?

- it must be applied widely and to all patients with this specific need
- it is important, but can be applied not to all patients with this specific need
- less important, it can be applied on a voluntary basis
- very low importance

## Assessment

**It is recommended that evaluation of angle of trunk rotation is carried out by clinicians specialized in spinal deformities (physicians, physiotherapists)**

121. Do you agree with this recommendation ?

- No
- Yes
- Yes, with the following correction

122. What is the strength of this recommendation ?

- it must be applied widely and to all patients with this specific need
- it is important, but can be applied not to all patients with this specific need
- less important, it can be applied on a voluntary basis
- very low importance

## Assessment

**It is recommended that patients are always examined by the same clinicians specialized in spinal deformities. In settings in which this is not possible, it is recommended regular standardization and validation processes of the methods used**

123. Do you agree with this recommendation ?

- No
- Yes
- Yes, with the following correction

124. What is the strength of this recommendation ?

- it must be applied widely and to all patients with this specific need
- it is important, but can be applied not to all patients with this specific need
- less important, it can be applied on a voluntary basis
- very low importance

## Assessment

**It is recommended not to perform x-rays if the Adam's test is negative and the Scoliometer value is below 5°, unless otherwise justified in the opinion of a clinician specialized in conservative treatment of spinal deformities**

125. Do you agree with this recommendation ?

- No
- Yes
- Yes, with the following correction

126. What is the strength of this recommendation ?

- it must be applied widely and to all patients with this specific need
- it is important, but can be applied not to all patients with this specific need
- less important, it can be applied on a voluntary basis
- very low importance



## Assessment

**It is recommended that, every time they evaluate children aged from 8 to 15 years, pediatricians, general practitioners and sports physicians perform the Adam's test for scoliosis screening purposes, using the Scoliometer**

127. Do you agree with this recommendation ?

- No
- Yes
- Yes, with the following correction

128. What is the strength of this recommendation ?

- it must be applied widely and to all patients with this specific need
- it is important, but can be applied not to all patients with this specific need
- less important, it can be applied on a voluntary basis
- very low importance

**It is recommended for clinical follow-up the use of validated methods of assessment and standard clinical data collection forms**

129. Do you agree with this recommendation ?

- No
- Yes
- Yes, with the following correction

130. What is the strength of this recommendation ?

- it must be applied widely and to all patients with this specific need
- it is important, but can be applied not to all patients with this specific need
- less important, it can be applied on a voluntary basis
- very low importance

**It is recommended to take into account the measurement error appointed for each method applied for the assessment of scoliosis patients**

131. Do you agree with this recommendation ?

- No
- Yes
- Yes, with the following correction

132. What is the strength of this recommendation ?

- it must be applied widely and to all patients with this specific need
- it is important, but can be applied not to all patients with this specific need
- less important, it can be applied on a voluntary basis
- very low importance

**It is recommended to assess in scoliosis patients aesthetics, sagittal alignment of the spine, joint hypermobility/laxity and cardiorespiratory function**

133. Do you agree with this recommendation ?

- No
- Yes
- Yes, with the following correction

134. What is the strength of this recommendation ?

- it must be applied widely and to all patients with this specific need
- it is important, but can be applied not to all patients with this specific need
- less important, it can be applied on a voluntary basis
- very low importance

**It is recommended that for assessment of aesthetics validated methods should be used**

135. Do you agree with this recommendation ?

- No
- Yes
- Yes, with the following correction

136. What is the strength of this recommendation ?

- it must be applied widely and to all patients with this specific need
- it is important, but can be applied not to all patients with this specific need
- less important, it can be applied on a voluntary basis
- very low importance

**It is recommended that aesthetics is assessed with using surface topography, photography or appropriate questionnaires**

137. Do you agree with this recommendation ?

- No
- Yes
- Yes, with the following correction

138. What is the strength of this recommendation ?

- it must be applied widely and to all patients with this specific need
- it is important, but can be applied not to all patients with this specific need
- less important, it can be applied on a voluntary basis
- very low importance

**The sagittal spine balance should be assessed with X-ray**

139. Do you agree with this recommendation ?

- No
- Yes
- Yes, with the following correction

140. What is the strength of this recommendation ?

- it must be applied widely and to all patients with this specific need
- it is important, but can be applied not to all patients with this specific need
- less important, it can be applied on a voluntary basis
- very low importance

**For clinical evaluation of sagittal balance the digital inclinometer and Spinal Mouse may be used**

141. Do you agree with this recommendation ?

- No
- Yes
- Yes, with the following correction

142. What is the strength of this recommendation ?

- it must be applied widely and to all patients with this specific need
- it is important, but can be applied not to all patients with this specific need
- less important, it can be applied on a voluntary basis
- very low importance



**It is recommended to assess joint hypermobility/laxity with using Beighton score in children qualified to conservative treatment (especially scoliosis specific exercises)**

143. Do you agree with this recommendation ?

- No
- Yes
- Yes, with the following correction

144. What is the strength of this recommendation ?

- it must be applied widely and to all patients with this specific need
- it is important, but can be applied not to all patients with this specific need
- less important, it can be applied on a voluntary basis
- very low importance

**It is recommended to assess function of cardiorespiratory system and physical capacity in scoliosis patients**

**LoE: III**

145. Do you think this recommendation should be rephrased?

- No
- Yes, with the following correction

146. What is the strength of this recommendation ?

- it must be applied widely and to all patients with this specific need
- it is important, but can be applied not to all patients with this specific need
- less important, it can be applied on a voluntary basis
- very low importance

## Assessment

**It is recommended during growth that clinical follow-up examinations are performed at least twice a year, a part periods of rapid growth (pubertal spurt, first three years of life)**

147. Do you agree with this recommendation ?

- No
- Yes
- Yes, with the following correction

148. What is the strength of this recommendation ?

- it must be applied widely and to all patients with this specific need
- it is important, but can be applied not to all patients with this specific need
- less important, it can be applied on a voluntary basis
- very low importance

**It is recommended that the decision whether to perform a radiographic study should be made by a physician specialized in spinal deformities**

149. Do you agree with this recommendation ?

- No
- Yes
- Yes, with the following correction

150. What is the strength of this recommendation ?

- it must be applied widely and to all patients with this specific need
- it is important, but can be applied not to all patients with this specific need
- less important, it can be applied on a voluntary basis
- very low importance

## Assessment

**It is recommended that frontal radiographic studies are made postero-anteriorly, using digital films with a ratio x-rays, including visualization of the femoral heads and protection of the gonads, in any standing position without the use of support aids or indication of correct posture, unless otherwise justified in the opinion of a clinician specialized in spinal deformities**

151. Do you agree with this recommendation ?

- No
- Yes
- Yes, with the following correction

152. What is the strength of this recommendation ?

- it must be applied widely and to all patients with this specific need
- it is important, but can be applied not to all patients with this specific need
- less important, it can be applied on a voluntary basis
- very low importance

**It is recommended that curve magnitude is measured using the Cobb method**

153. Do you agree with this recommendation ?

- No
- Yes
- Yes, with the following correction

154. What is the strength of this recommendation ?

- it must be applied widely and to all patients with this specific need
- it is important, but can be applied not to all patients with this specific need
- less important, it can be applied on a voluntary basis
- very low importance

**It is recommended that vertebral rotation is measured on the apical vertebra using either the Perdriolle torsionmeter or the Raimondi tables/ruler**

155. Do you agree with this recommendation ?

- No
- Yes
- Yes, with the following correction

156. What is the strength of this recommendation ?

- it must be applied widely and to all patients with this specific need
- it is important, but can be applied not to all patients with this specific need
- less important, it can be applied on a voluntary basis
- very low importance

**It is recommended that the first and last radiographic evaluation include also a standing lateral view**

157. Do you agree with this recommendation ?

- No
- Yes
- Yes, with the following correction

158. What is the strength of this recommendation ?

- it must be applied widely and to all patients with this specific need
- it is important, but can be applied not to all patients with this specific need
- less important, it can be applied on a voluntary basis
- very low importance



## Assessment

**On radiographic lateral view, the patient's upper extremities should be placed in a position to uncover the upper thoracic spine. The recommended positions comprise: (1) 45° angle flexion of the arms, elbows extended and hands resting on a support to preserve the sagittal curvature of the spine, (2) the arms crossed over the breasts , (3) the hand resting on the ipsilateral shoulder without pressing it**

159. Do you agree with this recommendation ?

- No
- Yes
- Yes, with the following correction

160. What is the strength of this recommendation ?

- it must be applied widely and to all patients with this specific need
- it is important, but can be applied not to all patients with this specific need
- less important, it can be applied on a voluntary basis
- very low importance

## Assessment

**To reduce the invasiveness of follow-up, it is recommended that no more than 1 radiographic study per year should be performed, unless it is truly necessary and is decided by a clinician specialized in spinal diseases**

161. Do you agree with this recommendation ?

- No
- Yes
- Yes, with the following correction

162. What is the strength of this recommendation ?

- it must be applied widely and to all patients with this specific need
- it is important, but can be applied not to all patients with this specific need
- less important, it can be applied on a voluntary basis
- very low importance

**To reduce the invasiveness of follow-up, it is recommended that the least number of projections is made on radiographic studies**

163. Do you agree with this recommendation ?

- No
- Yes
- Yes, with the following correction

164. What is the strength of this recommendation ?

- it must be applied widely and to all patients with this specific need
- it is important, but can be applied not to all patients with this specific need
- less important, it can be applied on a voluntary basis
- very low importance

**It is recommended that all idiopathic scoliosis patients, even if not treated, are regularly followed-up**

165. Do you agree with this recommendation ?

- No
- Yes
- Yes, with the following correction

166. What is the strength of this recommendation ?

- it must be applied widely and to all patients with this specific need
- it is important, but can be applied not to all patients with this specific need
- less important, it can be applied on a voluntary basis
- very low importance

## Assessment

167. Do you suggest any other relevant recommendation on Assessment?

168. Do you suggest any other relevant recommendation on Assessment ?

169. Do you suggest any other relevant recommendation on Assessment ?

170. Do you suggest any other relevant recommendation on Assessment ?

171. Do you suggest any other relevant recommendation on Assessment ?
