# Supplementary material for: 2016 SOSORT guidelines: orthopaedic and rehabilitation treatment of idiopathic scoliosis during growth
Source: Springer Nature journal article supplement (doi:10.1186/s13013-017-0145-8), 2018-01-10
Supplement: MOESM4 [file 15361988]

## Bracing

**It is recommended that scoliosis specific exercises are prescribed to patients wearing braces**

1. Do you agree with this recommendation ?

- No
- Yes
- Yes, with suggestions

2. What is the strength of this recommendation ?

- it must be applied widely and to all patients with this specific need
- it is important, but can be applied not to all patients with this specific need
- less important, it can be applied on a voluntary basis
- very low importance

## Bracing

**It is recommended that braces are regularly changed according to growth (maximum acceptable changes ... cm., ... kg, ... months) and/or specific pathological needs as judged by a scoliosis expert physician. A brace change should be free of charge if occurring before ... months.**

3. What is the number of months that makes mandatory for you to change a brace ?

- It is inappropriate to define such a value - individual expert choice
- I don't know
- Number of months

4. What is the number of cm of height growth that makes mandatory for you to change a brace ?

- It is inappropriate to define such a value - individual expert choice
- I don't know

Number of centimeters

5. What is the number of kg of weight growth that makes mandatory for you to change a brace ?

- It is inappropriate to define such a value - individual expert choice
- I don't know
- Number of kilograms

6. What is the minimum number of months that should be defined before paying a change of brace ?

Eplanation: if a brace is totally inappropriate should be changed immediately free of charge - so how long can it take to make a change needed for pathological and/or growth reasons ?

- It is inappropriate to define such a value - individual expert choice
- I don't know
- Number of months

7. Do you agree with this recommendation ? (numerical value will be inserted ONLY if felt appropriate by at least 80% of respondents)

- No
- Yes
- Yes, with suggestions

8. What is the strength of this recommendation ?

- it must be applied widely and to all patients with this specific need
- it is important, but can be applied not to all patients with this specific need
- less important, it can be applied on a voluntary basis
- very low importance

## Bracing

**It is recommended that out of brace x-rays are regularly performed to check the effectiveness of bracing treatment: the number of hours out of brace before x-ray taking should correspond to the daily weaning time**

9. Do you agree with this recommendation ?

- No
- Yes
- Yes, with suggestions

10. Do you agree to leave the second part of the recommendation "the number of hours out of brace before x-ray taking should correspond to the daily weaning time" ?

- No
- Yes
- Yes, with suggestions

11. What is the strength of this recommendation ?

- it must be applied widely and to all patients with this specific need
- it is important, but can be applied not to all patients with this specific need
- less important, it can be applied on a voluntary basis
- very low importance

## Bracing

**It is recommended that brace is definitively weaned when bone maturity is reached and results are checked with an x-ray after 48 hours without wearing the brace**

12. Do you agree to define:

- bone growth until Risser 3
- bone maturity until Risser 5 or ringapophysis closure
- none of the above

13. Do you agree with this recommendation ?

- No
- Yes
- Yes, with suggestions

14. What is the strength of this recommendation ?

- it must be applied widely and to all patients with this specific need
- it is important, but can be applied not to all patients with this specific need
- less important, it can be applied on a voluntary basis
- very low importance

**It is recommended that therapists implement a compliance system for exercise tracking**

15. Do you agree with this recommendation ?

- No
- Yes
- Yes, with suggestons

16. What is the strength of this recommendation ?

- it must be applied widely and to all patients with this specific need
- it is important, but can be applied not to all patients with this specific need
- less important, it can be applied on a voluntary basis
- very low importance

## Physiotherapeutic Scoliosis Specific Exercises

**It is recommended that therapists regularly assess patients quality of Physiotherapeutic Scoliosis Specific Exercises performed by the patients**

17. Do you agree with this recommendation ?

- No
- Yes
- Yes, with suggestons

18. What is the strength of this recommendation ?

- it must be applied widely and to all patients with this specific need
- it is important, but can be applied not to all patients with this specific need
- less important, it can be applied on a voluntary basis
- very low importance

## Physiotherapeutic Scoliosis Specific Exercises

**It is recommended that Physiotherapeutic Scoliosis Specific Exercises difficulty is progressively increased according to patient ability**

19. Do you agree with this recommendation ?

- No
- Yes
- Yes, with the suggestions

20. What is the strength of this recommendation ?

- it must be applied widely and to all patients with this specific need
- it is important, but can be applied not to all patients with this specific need
- less important, it can be applied on a voluntary basis
- very low importance



## Physiotherapeutic Scoliosis Specific Exercises

**It is recommended that Physiotherapeutic Scoliosis Specific Exercises are taught individually in a 1 to 1 relationship to assure individualized care, while regular performance could also be at home or in little groups**

21. Do you agree with this recommendation ?

- No
- Yes
- Yes, with suggestions

22. What is the strength of this recommendation ?

- it must be applied widely and to all patients with this specific need
- it is important, but can be applied not to all patients with this specific need
- less important, it can be applied on a voluntary basis
- very low importance

**It is recommended to regularly perform quality of life assessment through validated questionnaires**

23. Do you agree with this recommendation ?

- No
- Yes
- Yes, with suggestions

24. What is the strength of this recommendation ?

- it must be applied widely and to all patients with this specific need
- it is important, but can be applied not to all patients with this specific need
- less important, it can be applied on a voluntary basis
- very low importance
